# Supplementary material for: Inadequate food intake at high temperatures is related to depressed mitochondrial respiratory capacity
Source: Oxford University Press journal article supplement (doi:10.1242/jeb.133025), 2016-01-01
Supplement: jeb133025supp.pdf [file jeb133025supp.pdf]

**Table S1. Parameters (intercept and slope  $\beta \pm SE$ ) from regression analyses of mass-specific (pmol O<sub>2</sub> s<sup>-1</sup> mg<sup>-1</sup> wet tissue) COX activity on homogenate concentration in the (a) liver and (b) muscle, and mass-specific mitochondrial leak respiration (LEAK) and phosphorylative respiration (OXPHOS) as a function of COX activity in both the liver (c, d) and muscle (e, f).**

| Dependent variable              | Independent variable            | Intercept $\pm$ SE | $\beta \pm SE$      | r <sup>2</sup> | p value |
|---------------------------------|---------------------------------|--------------------|---------------------|----------------|---------|
| (a) Mass-specific liver COX     | Liver homogenate concentration  | -5.621 $\pm$ 0.756 | 103.101 $\pm$ 6.533 | 0.626          | < 0.001 |
| (b) Mass-specific muscle COX    | Muscle homogenate concentration | 0.246 $\pm$ 0.976  | 25.283 $\pm$ 19.563 | 0.044          | 0.803   |
| (c) Mass-specific liver LEAK    | Corrected liver COX             | 0.060 $\pm$ 0.016  | 3.590 $\pm$ 0.114   | 0.310          | 0.001   |
| (d) Mass-specific liver OXPHOS  | Corrected liver COX             | 0.283 $\pm$ 0.144  | 31.094 $\pm$ 1.054  | 0.105          | 0.058   |
| (e) Mass-specific muscle LEAK   | Mass-specific muscle COX        | 0.050 $\pm$ 0.006  | 0.090 $\pm$ 0.181   | 0.686          | < 0.001 |
| (f) Mass-specific muscle OXPHOS | Mass-specific muscle COX        | 0.433 $\pm$ 0.037  | 2.127 $\pm$ 1.118   | 0.809          | < 0.001 |

We tested whether the mass-specific (pmol O<sub>2</sub> s<sup>-1</sup> mg<sup>-1</sup> wet tissue) cytochrome c oxidase (COX) activity – a measure of mitochondrial density - in the liver and muscle was influenced by its concentration of homogenate (mg ml<sup>-1</sup> buffer) in the respirometry chamber. The auto-oxidation of ascorbate and N,N,N',N'-Tetramethyl-p-phenylenediamine dihydrochloride – molecules used to assess COX activity - generate a “chemical background” consumption of oxygen which is not due to the biological sample, so the measured mass-specific COX activities were affected by a constant noise. This chemical background may bias calculations of the oxygen flux per mass of tissue; its magnitude is indicated by the intercept of the relationship between oxygen flux and tissue mass (i.e. the calculated oxygen flux in the respirometry chamber in the absence of any tissue sample; intercepts (a) and (b) in supplemental table 2). The chemical background can normally be quantified by measuring oxygen flux after inhibition of COX with cyanide, but in the present study this was not feasible because the use of pyruvate substrate reverses the inhibition by cyanide. We used regression analyses to assess the effect of homogenate concentration in the respirometry chamber on mass-specific COX activity for each tissue. The homogenate concentration of the white muscle (mean  $\pm$  SE: 20.0  $\pm$  0.1 mg mL<sup>-1</sup>) had no effect on COX activity (supplemental table 1 (b)), so the (uncorrected) mass-specific COX activity of the muscle was used in subsequent analyses. In contrast, homogenate concentration (mean  $\pm$  SE: 8.5  $\pm$  0.3 mg mL<sup>-1</sup>) significantly influenced mass-specific COX activity in the liver (supplemental table 2), so corrected COX activity, calculated as the residual from this regression (regression (a)) was used as covariate in future analyses. In the case of the liver, COX activity is corrected for homogenate concentration (corrected COX activity), whereas for muscle no correction was needed for homogenate concentration. For clarity, the variable “corrected liver COX” is referred to as “liver COX” in the main article.

**Table S2:** Results from linear regression analyses of specific growth rate (% change in mass per day) in brown trout (*Salmo trutta*, n = 35) as a function of mitochondrial respiratory capacities and food intake (Model 1: Cytochrome oxidase (COX) activity, COX-normalized leak respiration rate (LEAK<sub>cox</sub>), COX-normalized phosphorylating respiration rate (OXPHOS<sub>cox</sub>); Model 2: Respiratory control ratio (RCR)). Bold denotes significance.

| <b>Growth in length</b>            |                         |    |          |                  |
|------------------------------------|-------------------------|----|----------|------------------|
| <i>Predictors</i>                  | Parameter estimate ± SE | df | <i>t</i> | <i>p</i> value   |
| <b>Model 1</b>                     |                         |    |          |                  |
| <b>Food intake</b>                 | 0.004 ± 0.001           | 27 | 4.697    | <b>&lt;0.001</b> |
| <b>Liver LEAK<sub>cox</sub></b>    | -0.002 ± 0.031          | 27 | -0.052   | 0.959            |
| <b>Liver OXPHOS<sub>cox</sub></b>  | -0.000 ± 0.003          | 27 | -0.081   | 0.936            |
| <b>Liver COX activity</b>          | -0.000 ± 0.002          | 27 | -0.179   | 0.859            |
| <b>Muscle LEAK<sub>cox</sub></b>   | 0.071 ± 0.110           | 27 | 0.643    | 0.526            |
| <b>Muscle OXPHOS<sub>cox</sub></b> | 0.001 ± 0.018           | 27 | 0.031    | 0.975            |
| <b>Muscle COX activity</b>         | -0.004 ± 0.003          | 27 | -1.149   | 0.261            |
| <b>Model 2</b>                     |                         |    |          |                  |
| <b>Food intake</b>                 | 0.004 ± 0.001           | 31 | 8.079    | <b>&lt;0.001</b> |
| <b>Liver RCR</b>                   | 0.001 ± 0.009           | 31 | 0.133    | 0.895            |
| <b>Muscle RCR</b>                  | -0.011 ± 0.017          | 31 | -0.651   | 0.520            |

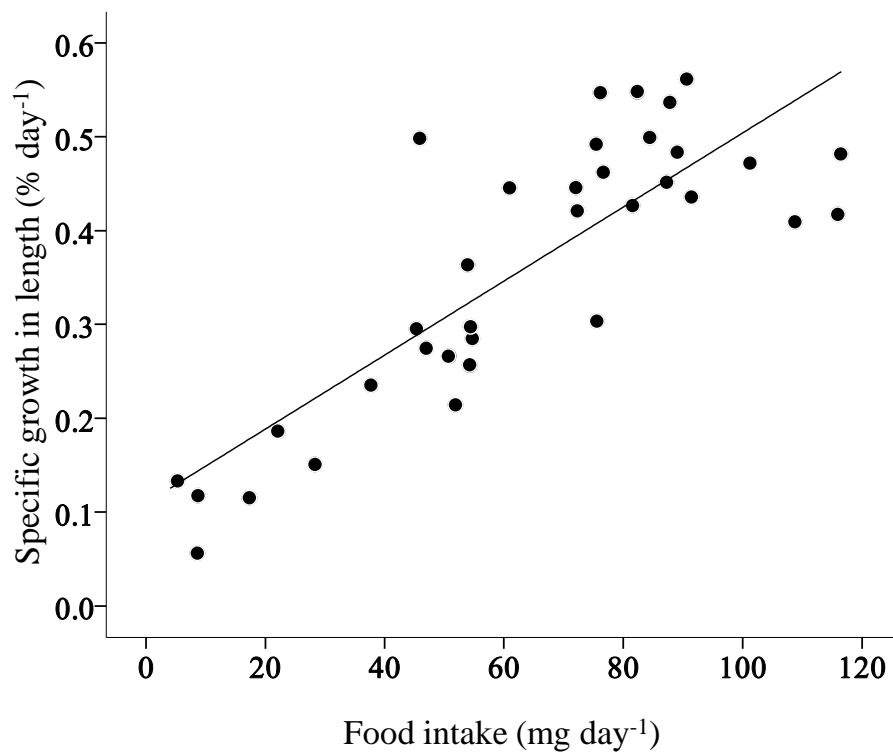

**Fig. S1.** Relationship between food intake and specific growth in length of brown trout (*Salmo trutta*) maintained at 19°C.
